# Supplementary material for: High prevalence of gastrointestinal parasites of dogs from Saipan, Northern Mariana Islands, including the zoonotic Ancylostoma ceylanicum
Source: Research Square preprint supplement (doi:10.21203/rs.3.rs-7685880/v1), 2025-10-08
Supplement: Supplementary file 1 [file 2b98e78a06269cac563ff48f.docx]

**Supplementary Data, Table 1.** All parasites with associated gene targets capable of detection through the KeyScreen™ GI Parasite PCR Assay.

| **Parasite(s)** | **Gene Targets** |
| --- | --- |
| **Hookworms** | |
| *Ancylostoma* spp., *Ancylostoma caninum, Ancylostoma duodenale, Ancylostoma ceylanicum, Ancylostoma braziliense, Ancylostoma tubaeforme, Ancylostoma* markers associated with benzimidazole resistance, *Uncinaria stenocephala* | Ribosomal RNA genes, isotype-1 β-tubulin |
| **Roundworms** | |
| *Toxocara* spp., *Toxocara canis, Toxocara cati, Toxascaris leonina, Baylisascaris procyonis* | Ribosomal RNA gene |
| **Whipworms** | |
| *Trichuris vulpis, T. campanula, T. felis, T. serrata* | Ribosomal RNA gene |
| **Tapeworms** | |
| *Dipylidium caninum, Echinococcus multilocularis, Echinococcus granulosus, Taenia* spp. | Ribosomal RNA gene |
| ***Giardia*** | |
| *Giardia duodenalis, Giardia* assemblages A or B with zoonotic potential | Ribosomal RNA gene |
| **Coccidia (Sarcocystidae, Eimeridae)** | |
| *Cystoisospora canis, C. ohioensis complex, C. felis, C. rivolta, Eimeria* spp. | Ribosomal RNA gene |
| **Additional Protozoa** | |
| *Cryptosporidium canis, Cryptosporidium felis* | Ribosomal RNA gene |
| *Tritrichomonas blagburni, Neospora caninum, Toxoplasma gondii* |
